# Supplementary material for: Nontargeted and targeted metabolomics approaches reveal the key amino acid alterations involved in multiple myeloma
Source: PeerJ. 2022 Feb 9;10:e12918. doi: 10.7717/peerj.12918 (PMC8840056; doi:10.7717/peerj.12918)
Supplement: Supplemental Information 3 [file peerj-10-12918-s003.xlsx]

## Sheet: Sheet1
Supplementary Table 2 Differential metabolites between MM patients and healthy controls
name	adduct	description	VIP	Fold change	p-value	m/z	rt(s)
A: Postive-ion mode
M352T177	(M+H)+	Phe-Trp	1.12112	0.380509	5.04696e-06	352.164	176.722
M159T266_2	(M+CH3CN+H)+	L-Valine	2.41054	0.551355	6.13795e-06	159.112	266.015
M211T339	(M+CH3CN+H)+	1-Methylhistidine	1.09121	2.35543	7.17876e-05	211.118	338.854
M244T257_2	(M+CH3CN+Na)+	D-Mannose	1.64728	2.03806	8.22002e-05	244.078	257.186
M855T138	(M-2H+3Na)+	1-Stearoyl-2-oleoyl-sn-glycerol 3-phosphocholine (SOPC)	1.08351	0.686105	0.000191428	854.567	137.664
M188T257	(M+H-H2O)+	DL-Indole-3-lactic acid	5.90068	0.510438	0.000207042	188.07	257.354
M205T257	(M+H)+	L-Tryptophan	3.13399	0.489771	0.000313626	205.096	257.436
M143T367	(M+H-H2O)+	N6-Methyl-L-lysine	2.1745	3.26484	0.000337052	143.116	367.347
M552T123	M+	.beta.-Cryptoxanthin	1.0479	0.383961	0.000474908	552.424	123.262
M260T530	(M+H)+	Lys-Leu	1.04656	2.86637	0.000608246	260.196	529.837
M221T116	(M+NH4)+	Indole-3-pyruvic acid	1.11501	0.574618	0.000689029	221.091	116.299
M282T282	(M+H)+	N6-methyladenosine	1.74607	1.45014	0.0014717	282.119	282.332
M781T143	(M-H+2Na)+	Thioetheramide-PC	5.02857	0.699412	0.00161807	780.553	143.417
M298T101	(M+H)+	S-Methyl-5'-thioadenosine	1.97154	1.81696	0.00165486	298.096	100.57
M114T206	(M+H)+	Creatinine	3.64089	3.53512	0.00180429	114.065	206.351
M61T104_2	(M+H)+	Urea	3.94578	1.32853	0.00299933	61.0392	103.657
M735T149	(M+H)+	PC(16:0/16:0)	7.48987	1.38562	0.0030486	734.568	148.631
M138T286	(M+H)+	Anthranilic acid (Vitamin L1)	4.89575	3.0606	0.00331684	138.054	286.483
M217T366	(M+CH3CN+H)+	L-Citrulline	1.27383	1.4937	0.00333737	217.128	366.268
M123T64	(M+H)+	Nicotinamide	1.6793	1.58631	0.00339877	123.054	63.6005
M118T397	(M+H)+	Betaine	4.35229	1.24886	0.00340188	118.085	396.764
M585T67	(M+H)+	Bilirubin	7.19107	0.530673	0.00442404	585.27	66.791
M146T374_2	M+	(3-Carboxypropyl)trimethylammonium cation	8.30474	1.67777	0.00465573	146.117	374.401
M137T202	(M+H)+	Hypoxanthine	1.60573	2.42571	0.00473441	137.044	201.641
M158T120	(M+H-H2O)+	Indoleacetic acid	1.34057	0.559827	0.00481727	158.059	119.977
M173T243_2	(M+CH3CN+H)+	L-Isoleucine	2.25395	0.721676	0.00490783	173.128	242.764
M87T375	(M+H)+	4-Hydroxybutanoic acid lactone	1.06687	1.59365	0.00554615	87.0431	374.587
M189T532	(M+H)+	N6,N6,N6-Trimethyl-L-lysine	1.92843	1.74632	0.0059606	189.158	531.756
M134T347	(M-H+2Na)+	L-Alanine	1.60883	0.74204	0.00602525	134.017	347.057
M168T285	(M+CH3CN+Na)+	D(-)-beta-hydroxy butyric acid	1.62508	7.31293	0.00766639	168.062	284.571
M146T284	(M+H)+	4-acetamidobutanoate	1.1787	4.41895	0.00833713	146.08	284.395
M787T55	(M+H)+	1,2-dioleoyl-sn-glycero-3-phosphatidylcholine	15.0608	0.557675	0.00854647	786.601	55.1195
M122T51	(M+H)+	Phenylethylamine	1.67822	5.13229	0.00959733	122.095	50.787
M153T83_2	(M+H)+	N1-Methyl-2-pyridone-5-carboxamide	9.13518	3.23274	0.0104814	153.065	83.129
M277T107	(M+H)+	Stearidonic Acid	1.16064	0.682751	0.0142691	277.215	106.647
M132T243	(M+H)+	L-Norleucine	3.68436	15.6698	0.0151669	132.101	243.017
M76T328_2	(M+H)+	Trimethylamine N-oxide	4.82159	2.82015	0.0152428	76.0751	327.724
M134T28_2	(M+H)+	Oxindole	3.08267	2.07321	0.0161288	134.059	28.2485
M108T48	(M+H)+	Benzylazanium	1.14723	1.55109	0.0182471	108.079	48.358
M174T577	(M+CH3CN+H)+	Ornithine	1.7478	2.30465	0.0184798	174.122	577.357
M217T87_2	(M+H)+	3-Hydroxydodecanoic acid	1.38359	0.584931	0.0209927	217.179	87.339
M170T429	(M+H)+	3-Methylhistidine	2.22811	3.07306	0.0214072	170.091	429.351
M300T94	(M+H)+	Sphingosine	1.03058	1.66567	0.0230168	300.288	93.848
M568T188	(M-H+2Na)+	1-Stearoyl-2-hydroxy-sn-glycero-3-phosphocholine	3.0217	0.765523	0.025303	568.338	187.861
M176T401	(M+H)+	Guanidinosuccinic acid	2.15645	12.9516	0.0269318	176.065	400.618
M131T308_2	(M+CH3CN+H)+	Sarcosine	2.00988	0.73116	0.0336683	131.081	307.988
M130T577	(M+H)+	.beta.-Homoproline	1.10682	1.81246	0.0360307	130.085	576.796
M265T225	(M+H)+	Alpha-N-Phenylacetyl-L-glutamine	5.86446	7.70581	0.0370386	265.118	225.025
M100T201	(M+H-H2O)+	Guanidoacetic acid	1.29859	11.0889	0.0399627	100.049	200.937
M130T225	(M+H)+	L-Pyroglutamic acid	2.42362	6.62065	0.040184	130.049	224.866
M204T304_2	(M+H)+	Acetylcarnitine	18.3304	1.41708	0.044056	204.123	303.972
M162T364_2	(M+H)+	L-Carnitine	4.64598	1.35044	0.0461836	162.112	363.668
M114T48	(M+H-2H2O)+	Triethanolamine	2.43692	2.69172	0.0468125	114.09	48.0815
M70T311_2	(M+H-2H2O)+	2-Amino-2-methyl-1,3-propanediol	2.50826	0.85869	0.0471004	70.0649	310.636
M496T165	(M+H)+	1-Palmitoyl-sn-glycero-3-phosphocholine	14.2718	0.372675	0.0480961	496.338	165.229
M544T165	(M+Na)+	1-Oleoyl-sn-glycero-3-phosphocholine	5.72601	0.302422	0.0492103	544.338	165.405
M146T119	(M+H-2H2O)+	DL-O-tyrosine	1.10999	0.745996	0.056199	146.059	118.689
M203T504	(M+H)+	NG,NG-dimethyl-L-arginine(ADMA)	3.81215	3.03991	0.064301	203.149	504.223
M568T164	(M-H+2Na)+	1-Stearoyl-sn-glycerol 3-phosphocholine	2.96292	0.430817	0.0787317	568.338	164.429
M732T127	(M+H)+	Sphingomyelin (d18:1/18:0)	3.00728	1.31038	0.0808128	731.604	127.48
M116T311_2	(M+H)+	D-Proline	3.33224	0.878149	0.0953864	116.07	310.636
M156T395	(M+H)+	L-Histidine	3.1157	0.815474	0.0975385	156.076	394.871
B: Negative-ion mode
M165T33	(M-H)-	1-Methylxanthine	1.29674	3.52219	1.09275e-08	165.04	33.4435
M116T300_2	(M-H)-	5-Aminopentanoic acid	2.95861	0.64582	0.000121336	116.071	299.76
M130T255	(M-H)-	N-Acetyl-L-alanine	1.32199	2.26537	0.000237947	130.05	255.04
M151T243	(M-H)-	Xylitol	1.16485	2.83437	0.000394552	151.06	243.441
M161T390	(M-H2O-H)-	D-Tagatose	1.18826	3.33905	0.000456653	161.045	389.697
M471T38	(M-H)-	Maslinic Acid	1.01296	0.5035	0.000533875	471.345	37.553
M153T244	(M+Na-2H)-	L-Asparagine	1.33511	3.87211	0.000629712	153.03	243.988
M112T171_2	(M-H)-	Creatinine	5.00108	3.42117	0.00077153	112.051	170.657
M163T105_1	(M-H)-	L-Rhamnose	1.00413	2.23111	0.0009348	163.06	104.656
M243T244	(M-H)-	Pseudouridine	3.55039	4.19308	0.000947864	243.061	243.975
M203T257	(M-H)-	L-Tryptophan	2.64095	0.5671	0.00100028	203.082	257.026
M107T26	(M-H)-	p-Cresol	6.18563	3.55707	0.00120663	107.05	26.062
M135T311	(M-H)-	L-Threonate	2.16601	3.35484	0.00121436	135.029	311.486
M239T391	(M+CH3COO)-	D-Mannose	1.22709	3.70146	0.00129359	239.076	390.668
M179T390	(M-H)-	myo-Inositol	2.77879	3.56027	0.00140805	179.055	390.45
M464T163	(M-H)-	Glycocholic acid	1.01312	0.63407	0.001417	464.31	163.404
M263T45	(M-H)-	3-Methoxy-4-Hydroxyphenylglycol Sulfate	3.14291	4.29304	0.00164974	263.022	44.716
M349T169	(M-H)-	Tetrahydrocorticosterone	1.36887	0.518571	0.00405068	349.236	168.725
M149T335	(M-H)-	D-Lyxose	1.30342	5.42974	0.00424784	149.045	334.971
M583T37	(M-H)-	Bilirubin	1.21589	0.377778	0.00455357	583.254	37.089
M191T339	(M-H)-	Quinate	1.09418	4.19039	0.00475699	191.055	339.485
M129T63	(M-H)-	ketoisocaproic acid	17.6731	0.559754	0.00484063	129.056	63.461
M133T110	(M-H)-	2,3-Dihydroxy-3-methylbutyric acid	1.67844	3.98011	0.00535345	133.05	109.811
M193T385	(M-H)-	D-galacturonic acid	1.26213	4.21751	0.0062155	193.034	384.801
M212T29	(M-H)-	Indoxyl sulfate	30.6207	2.55183	0.00788568	212.002	29.326
M391T131	(M-H)-	Chenodeoxycholate	1.97384	0.608867	0.00854496	391.283	131.233
M135T171_2	(M-H)-	Hypoxanthine	3.67416	2.20265	0.0104682	135.03	171.338
M397T30_2	(M-H)-	Sunitinib	6.53068	0.416839	0.0104799	397.204	30.152
M233T33	(M-H)-	Confertifoline	2.85331	1.36055	0.0141038	233.154	32.559
M200T35	(M+Na-2H)-	Cyclohexylsulfamate	1.7125	19.023	0.0200871	200.038	34.896
M161T104	(M-H2O-H)-	L-Sorbose	1.12913	2.75462	0.0204782	161.044	104.155
M164T83	(M-H)-	Formylanthranilic acid	1.04842	1.97718	0.0232577	164.034	82.567
M181T299	(M-H)-	D-Sorbitol	3.04543	3.70371	0.0305409	181.07	299.073
M127T76	(M-H2O-H)-	Monomethyl glutaric acid	1.42225	4.64592	0.0329883	127.039	75.732
M395T28	(M-H)-	pregnenolone sulfate	1.89579	0.55154	0.0358041	395.187	28.166
M263T224	(M-H)-	Alpha-N-Phenylacetyl-L-glutamine	3.83759	9.1741	0.0375008	263.103	223.69
M187T105_2	(M-H)-	3-Hydroxycapric acid	1.22981	0.642614	0.0419642	187.133	105.102
M165T111	(M-H)-	DL-3-Phenyllactic acid	3.21961	1.85514	0.0442703	165.055	110.617
M145T373_2	(M-H)-	L-Glutamine	2.41252	0.858431	0.0581267	145.062	372.626
M204T167	(M-H)-	Indolelactic acid	1.44845	1.61486	0.0650092	204.065	167.474
M281T103_3	(M-H)-	Oleic acid	2.25032	1.2817	0.0784207	281.247	103.165
M178T197	(M-H)-	Hippuric acid	2.4092	4.38185	0.0885111	178.05	197.107
M151T218	(M-H)-	Xanthine	1.35597	2.13738	0.0900152	151.025	217.899
M227T47	(M-H)-	Myristic acid	3.51254	1.4687	0.0925009	227.2	47.2565
M253T46	(M-H)-	cis-9-Palmitoleic acid	5.30555	1.47359	0.0982143	253.216	45.573
