# Supplementary material for: Nontargeted and targeted metabolomics approaches reveal the key amino acid alterations involved in multiple myeloma
Source: PeerJ. 2022 Feb 9;10:e12918. doi: 10.7717/peerj.12918 (PMC8840056; doi:10.7717/peerj.12918)
Supplement: Supplemental Information 5 [file peerj-10-12918-s005.xlsx]

## Sheet: Sheet1
Supplementary Table 4 Differential amino acids metabolites between MM patients and healthy controls in the validation group (cohort 2)
Component Name	Mass Info	IS Name	Retention Time	QC-RSD	p-value	Fold change
lysine	147.1 / 84.0	is3_lysineD4	17.3497	0.0566932	0.018623	0.792498
serine	106.0 / 60.0	is7_serine13C315N	12.1399	0.0486888	0.0215683	0.781522
tyrosine	182.1 / 136.1	is10_tyrosine13C9	7.60396	0.112728	0.0088229	0.725202
leucine	132.1 / 86.2	is11_leucine13C6	5.5039	0.0528684	1.02668e-05	0.606668
Isoleucine	132.1 / 86.2	is11_leucine13C6	5.99379	0.108965	0.00072787	0.707556
histidine	156.1 / 110.1	is12_histidine13C6	17.3131	0.0525566	2.4055e-05	0.719958
valine	118.1 / 72.1	is14_valineD8	7.66236	0.0162722	1.56622e-07	0.592456
threonine	120.0 / 74.0	is15_threonineD515N	10.6624	0.0630428	0.00118484	0.68865
alanine/sarcosine	90.1 / 43.9	is19_alanineD4	10.5224	0.0410124	0.00703044	0.719557
Glutamine	147.0 / 84.1	is6_GlutamineD5	11.7678	0.149826	0.0104498	0.838289
creatinine	114.1 / 44.0	is16_asparate13C415N	5.57136	0.0870182	0.0368313	1.63246
tryptophan	205.1 / 146.3	is20_tryptophan13C11	5.55585	0.211959	3.93755e-05	0.453627
ornithine	133.1 / 70.1	is21_ornithineD6	17.5045	0.0427387	0.00900461	0.704373
taurine	126.0 / 44.1	is5_Arginine13C6	9.93217	0.0314875	0.00562133	0.633493
glutamate	148.1 / 84.1	is1_GlutamateD5	12.2747	0.0273688	0.34648	1.29152
glycine	76.0 / 30.1	is5_Arginine13C6	11.8973	0.199669	0.884607	0.967466
aspartate	134.0 / 74.1	is16_asparate13C415N	13.8765	N/A	N/A	N/A
arginine	175.1 / 70.0	is5_Arginine13C6	17.1772	0.0946487	0.928611	1.01912
methionine	150.1 / 133.0	is8_methionine13C515N	6.5816	0.0607585	0.0850023	0.826405
phenylalanine	166.1 / 103.1	is9_phenylalanineD5	4.94813	0.087638	0.499084	1.10293
proline	116.1 / 70.1	is13_DLprolineD7	8.88498	0.0278902	0.688808	0.945706
asparagine	133.1 / 74.2	is16_asparate13C415N	12.3611	0.110978	0.40082	0.923772
creatine	132.1 / 90.0	is8_methionine13C515N	11.0302	0.110478	0.691118	0.875949
spermidine	146.2 / 72.2	is15_threonineD515N	27.0128	N/A	N/A	N/A
spermine	203.1 / 84.0	is15_threonineD515N	22.975	N/A	N/A	N/A
citrulline	176.1 / 159.2	is19_alanineD4	13.0878	0.12299	0.92819	0.987406
Cysteine	122.1 / 59.0	is18_cysteine13C315N	9.35879	0.0165497	0.335631	0.991112
choline	104.1 / 60.0	is7_serine13C315N	7.8737	0.0596696	0.125194	1.23392
putrescine	89.0 / 72.0	is7_serine13C315N	19.6238	N/A	N/A	N/A
aminoadipic acid	162.0 / 98.0	is5_Arginine13C6	17.2739	0.0829746	0.618991	0.934523
hydroxyproline	132.1 / 86.1	is19_alanineD4	10.334	0.144027	0.0637918	1.47074
Cystine	241.1 / 151.9	is17_cystineD4	16.498	0.0414866	0.0601564	0.796733
